# Supplementary material for: Novel Sub-Clustering of Class III Skeletal Malocclusion Phenotypes in a Southern European Population Based on Proportional Measurements
Source: J Clin Med. 2020 Sep 22;9(9):3048. doi: 10.3390/jcm9093048 (PMC7565379; doi:10.3390/jcm9093048)
Supplement: Supplementary file 1 [file jcm-09-03048-s001.zip]

Archive with 4 entries (4 files):
- Supplementary Table 1. Mean values of proportional skeletal variables and supplementary variables. .pptx
- Supplementary Table 1. Mean values of proportional skeletal variables and supplementary variables.pdf
- Supplementary Table 2. Explanation of cephalometric measuremments and abbreviations..pdf
- Supplementary Table 2. Explanation of cephalometric measuremments..pptx
