# Supplementary material for: Novel Sub-Clustering of Class III Skeletal Malocclusion Phenotypes in a Southern European Population Based on Proportional Measurements
Source: J Clin Med. 2020 Sep 22;9(9):3048. doi: 10.3390/jcm9093048 (PMC7565379; doi:10.3390/jcm9093048)
Supplement: Supplementary file 1 [file jcm-09-03048-s001.zip › Supplementary Table 1. Mean values of proportional skeletal variables and supplementary variables.pdf]

**Supplementary Table 1. Mean values of proportional skeletal variables and supplementary variables.**

| Cephalometric measurements |                                                               | C1 (n=39)        | C2 (n=44)          | C3 (n=82)         | C4 (n=47)         |
|----------------------------|---------------------------------------------------------------|------------------|--------------------|-------------------|-------------------|
| SKELETAL PROPORTIONAL      | P-A Face Height (S-Go/N-Me) (%)                               | 64.967 ± 4.333   | 63.991 ± 3.755     | 68.888 ± 4.168    | 72.074 ± 4.972    |
|                            | PFH:AFH (%)                                                   | 53.023 ± 3.226   | 50.493 ± 3.156     | 57.398 ± 3.575    | 59.243 ± 3.783    |
|                            | S-Ar/Ar-Go (%)                                                | 66.097 ± 5.615   | 77.800 ± 6.282     | 63.037 ± 5.484    | 64.364 ± 5.881    |
|                            | UFH (N-ANS/(N-ANS+ANS-Me)) (%)                                | 42.000 ± 1.372   | 44.095 ± 1.892     | 43.423 ± 1.458    | 46.426 ± 1.457    |
|                            | LFH/TFH (ANS-Me:N-Me) (%)                                     | 58.092 ± 1.384   | 55.777 ± 1.915     | 56.618 ± 1.505    | 53.730 ± 1.491    |
|                            | Face Ht Ratio (N-ANS/ANS-Me) (%)                              | 0.721 ± 0.040    | 0.793 ± 0.069      | 0.766 ± 0.055     | 0.868 ± 0.062     |
|                            | SN/GoMe (%)                                                   | 93.615 ± 5.487   | 99.616 ± 6.655     | 105.483 ± 5.734   | 98.332 ± 5.427    |
|                            | ANS-PNS/Me-Go (%)                                             | 0.695 ± 0.050    | 0.748 ± 0.050      | 0.794 ± 0.048     | 0.745 ± 0.054     |
|                            | Articular Angle/SNB (%)                                       | 56.638 ± 3.999   | 54.542 ± 2.425     | 58.121 ± 4.033    | 57.608 ± 2.879    |
|                            | Saddle-Sella Angle (SN-Ar)/ SNA (%)                           | 64.884 ± 4.822   | 62.480 ± 4.231     | 64.659 ± 4.743    | 64.222 ± 3.157    |
|                            | Occ Plane to FH/FMA (MP-FH) (%)                               | 18.109 ± 15.424  | 23.919 ± 13.898    | 13.683 ± 18.126   | -2.186 ± 35.586   |
|                            | Occ Plane to SN/SN - GoGn (%)                                 | 46.947 ± 10.183  | 52.255 ± 8.561     | 47.619 ± 11.547   | 52.145 ± 13.341   |
|                            | Cranio-Mx Base (SN-Palatal Plane)/ SN - GoGn (%)              | 21.503 ± 8.671   | 28.414 ± 8.174     | 30.808 ± 10.287   | 43.745 ± 9.634    |
|                            | Anterior Cranial Base (SN) /Length of Mand Base (Go-Pg) (%)   | 89.338 ± 5.116   | 94.032 ± 5.917     | 99.534 ± 5.192    | 92.363 ± 4.603    |
|                            | Maxillary length (ANS-PNS)/Anterior Cranial Base (SN) (%)     | 75.287 ± 4.186   | 75.364 ± 3.925     | 75.016 ± 3.563    | 76.000 ± 3.275    |
|                            | Maxillary length (ANS-PNS)/Midface Length (Co-A) (%)          | 60.355 ± 3.179   | 61.570 ± 3.084     | 61.066 ± 2.843    | 60.913 ± 2.637    |
|                            | Maxillary length (ANS-PNS)/Length of Mand Base (Go-Pg) (%)    | 67.182 ± 4.261   | 70.721 ± 3.537     | 74.573 ± 3.713    | 70.163 ± 4.062    |
|                            | Midface Length (Co-A)/Mandibular length (Co-Gn) (%)           | 67.280 ± 3.258   | 70.999 ± 2.349     | 70.892 ± 2.699    | 71.560 ± 2.719    |
|                            | Mandibular Body Length (Go-Gn)/Mandibular length (Co-Gn) (%)  | 69.735 ± 2.314   | 70.317 ± 2.831     | 67.028 ± 2.640    | 72.103 ± 2.291    |
|                            | Ar - A/Ar - Gn (%)                                            | 70.040 ± 3.548   | 74.481 ± 2.315     | 74.086 ± 2.876    | 74.857 ± 2.850    |
|                            | Posterior Cranial Base (S-Ar)/Posterior Face Height (SGo) (%) | 41.560 ± 2.336   | 45.857 ± 2.058     | 40.871 ± 2.371    | 41.062 ± 2.358    |
|                            | Ramus Height (Ar-Go)/Posterior Face Height (SGo) (%)          | 63.039 ± 2.201   | 59.122 ± 2.436     | 65.021 ± 2.430    | 64.000 ± 2.444    |
|                            | Posterior Cranial Base (S-Ar)/Upper Face Height (N-ANS) (%)   | 64.144 ± 6.533   | 66.279 ± 5.715     | 64.594 ± 6.042    | 63.540 ± 5.473    |
|                            | Ramus Height (Ar-Go)/Lower Face Height (ANS-Me) (%)           | 70.382 ± 5.618   | 67.306 ± 4.823     | 78.802 ± 5.915    | 85.832 ± 7.108    |
|                            | Maxillary Skeletal (A-N Perp)/Mand. Skeletal (Pg-Na Perp) (%) | 56.107 ± 205.423 | 36.464 ± 128.822   | -54.800 ± 632.918 | 15.837 ± 25.755   |
|                            | Convexity (A-NPg)/Pg - NB (%)                                 | -84.825 ± 85.790 | -154.333 ± 197.248 | -107.003 ± 79.893 | -117.408 ± 47.705 |

Each value represents the mean and standard deviation (SD).

**Supplementary Table 1. Mean values of proportional skeletal variables and supplementary variables.**

|                  | Cephalometric measurements          | C1 (n=21)        | C2 (n=40)       | C3 (n=70)       | C4 (n=8)        |
|------------------|-------------------------------------|------------------|-----------------|-----------------|-----------------|
| SKELETAL ANGULAR | FH - SN (°)                         | 10.695 ± 2.873   | 11.252 ± 2.615  | 10.307 ± 2.580  | 11.183 ± 2.226  |
|                  | SNA (°)                             | 80.387 ± 3.632   | 78.123 ± 2.701  | 80.560 ± 3.642  | 81.098 ± 2.176  |
|                  | SNB (°)                             | 82.323 ± 3.730   | 78.870 ± 2.873  | 81.817 ± 3.676  | 82.694 ± 2.641  |
|                  | ANB (°)                             | -1.928 ± 1.804   | -0.750 ± 0.847  | -1.250 ± 1.467  | -1.600 ± 1.602  |
|                  | SND (°)                             | 80.521 ± 3.865   | 77.018 ± 2.910  | 79.762 ± 3.507  | 81.074 ± 2.731  |
|                  | Y-Axis (SGn-SN) (°)                 | 67.500 ± 4.472   | 69.066 ± 3.132  | 65.574 ± 3.498  | 63.766 ± 2.899  |
|                  | SN - GoGn (°)                       | 32.405 ± 6.267   | 33.134 ± 4.757  | 27.679 ± 5.010  | 22.911 ± 4.849  |
|                  | Cranio-Mx Base/SN-Palatal Plane (°) | 7.218 ± 3.660    | 9.455 ± 3.130   | 8.560 ± 3.168   | 10.100 ± 3.169  |
|                  | Occ Plane to SN (°)                 | 15.449 ± 5.495   | 17.245 ± 3.436  | 13.307 ± 4.327  | 12.170 ± 4.036  |
|                  | Occ Plane to FH (°)                 | 4.764 ± 4.663    | 5.989 ± 3.790   | 2.996 ± 3.648   | 0.996 ± 3.462   |
|                  | Facial Axis-Ricketts (NaBa-PtGn)(°) | 89.141 ± 4.424   | 87.375 ± 3.139  | 91.572 ± 3.856  | 93.930 ± 3.525  |
|                  | FMA (MP-FH) (°)                     | 23.644 ± 5.704   | 24.155 ± 4.391  | 19.498 ± 4.256  | 13.968 ± 4.404  |
|                  | Lower Face Height (ANS-Xi-Pm)(°)    | 47.085 ± 4.356   | 44.411 ± 3.277  | 43.577 ± 3.066  | 37.934 ± 2.683  |
|                  | Facial Angle (FH-NPo) (°)           | 94.246 ± 3.442   | 91.327 ± 2.989  | 93.224 ± 2.822  | 95.787 ± 2.572  |
|                  | N-A-Pg (°)                          | -6.459 ± 4.192   | -4.175 ± 2.633  | -4.888 ± 3.998  | -7.721 ± 4.510  |
|                  | Facial Taper (°)                    | 62.118 ± 4.917   | 64.525 ± 3.423  | 67.278 ± 4.008  | 70.236 ± 3.812  |
|                  | Gonial/Jaw Angle (Ar-Go-Me) (°)     | 124.395 ± 6.395  | 125.286 ± 6.356 | 123.789 ± 6.273 | 114.945 ± 5.915 |
|                  | Upper Gonial Angle (Ar-Go-Na) (°)   | 47.633 ± 3.416   | 49.855 ± 3.752  | 50.680 ± 4.235  | 47.772 ± 3.970  |
|                  | Lower Gonial Angle (Na-Go-Me) (°)   | 76.762 ± 6.097   | 75.423 ± 4.539  | 73.111 ± 4.249  | 67.179 ± 3.919  |
|                  | Articular Angle (°)                 | 145.677 ± 5.909  | 144.773 ± 5.850 | 141.116 ± 6.619 | 143.757 ± 5.522 |
|                  | Saddle/Sella Angle (SN-Ar) (°)      | 124.259 ± 5.952  | 125.361 ± 5.262 | 124.901 ± 4.956 | 126.440 ± 3.812 |
|                  | Superior Angle SN-AB (°)            | 85.087 ± 4.975   | 80.055 ± 3.553  | 83.676 ± 4.609  | 85.419 ± 4.864  |
|                  | Rp-FH (°)                           | 79.241 ± 4.614   | 78.868 ± 4.763  | 75.711 ± 4.688  | 79.023 ± 3.936  |
| SKELETAL LINEAR  | Anterior Cranial Base (SN) (mm)     | 66.190 ± 5.200   | 67.586 ± 4.490  | 70.045 ± 4.221  | 67.821 ± 4.823  |
|                  | Anterior Face Height (NaMe) (mm)    | 123.246 ± 13.085 | 119.973 ± 8.109 | 119.452 ± 7.316 | 113.783 ± 8.475 |
|                  | Upper Face Height (N-ANS) (mm)      | 51.897 ± 4.965   | 53.191 ± 3.786  | 52.133 ± 3.561  | 53.000 ± 4.008  |
|                  | Lower Face Height (ANS-Me) (mm)     | 71.838 ± 8.505   | 67.518 ± 5.670  | 67.949 ± 4.613  | 61.215 ± 5.095  |
|                  | Posterior Cranial Base (S-Ar) (mm)  | 33.149 ± 3.555   | 35.205 ± 3.505  | 33.668 ± 3.846  | 33.609 ± 3.171  |
|                  | Posterior Face Height (SGo) (mm)    | 79.815 ± 7.844   | 76.748 ± 6.611  | 82.317 ± 7.373  | 82.000 ± 8.139  |
|                  | Ramus Height (Ar-Go) (mm)           | 50.326 ± 5.406   | 45.325 ± 3.758  | 53.500 ± 4.968  | 52.519 ± 6.004  |
|                  | Co-Go (mm)                          | 65.215 ± 6.903   | 60.548 ± 5.356  | 68.604 ± 6.447  | 67.409 ± 6.712  |
|                  | Convexity (A-NPo) (mm)              | -3.313 ± 2.132   | -2.027 ± 1.233  | -2.387 ± 1.922  | -3.566 ± 2.178  |
|                  | Maxillary Skeletal (A-Na Perp) (mm) | 1.074 ± 3.263    | -0.723 ± 2.835  | 0.873 ± 2.921   | 2.226 ± 2.421   |
|                  | Midface Length (Co-A) (mm)          | 82.603 ± 7.088   | 82.682 ± 4.894  | 86.111 ± 6.248  | 84.600 ± 5.704  |
|                  | Ar - A (mm)                         | 81.287 ± 6.524   | 81.323 ± 5.011  | 85.227 ± 6.201  | 84.351 ± 6.012  |
|                  | Maxillary length (ANS-PNS) (mm)     | 49.810 ± 4.588   | 50.841 ± 2.974  | 52.511 ± 3.567  | 51.500 ± 3.651  |
|                  | Pog - NB (mm)                       | 2.551 ± 2.242    | 2.357 ± 1.694   | 2.156 ± 1.866   | 3.566 ± 1.796   |
|                  | Mand. Skeletal (Pg-Na Perp) (mm)    | 8.536 ± 7.085    | 2.423 ± 5.825   | 6.267 ± 5.572   | 10.623 ± 4.812  |
|                  | Mandibular Body Length (Go-Gn)(mm)  | 85.674 ± 7.414   | 81.893 ± 5.319  | 81.388 ± 5.545  | 85.353 ± 7.075  |
|                  | Length of Mand Base (Go-Pg)(mm)     | 74.274 ± 6.629   | 71.952 ± 3.737  | 70.483 ± 4.505  | 73.523 ± 5.286  |
|                  | Mandibular length (Co-Gn)(mm)       | 123.046 ± 12.052 | 116.475 ± 6.136 | 121.500 ± 7.992 | 118.332 ± 8.352 |
|                  | Co-B1 Total mand (mm)               | 120.644 ± 11.657 | 114.420 ± 6.292 | 119.287 ± 7.672 | 115.677 ± 8.065 |
|                  | Ar - Gn (mm)                        | 116.328 ± 10.870 | 109.184 ± 5.831 | 115.060 ± 7.406 | 112.791 ± 8.438 |
|                  | Basal Width (mm)                    | 6.451 ± 1.806    | 7.136 ± 1.109   | 7.462 ± 1.532   | 7.881 ± 1.384   |
|                  | Mx/Md diff (Co-Gn - Co-A)(mm)       | 40.446 ± 6.836   | 33.780 ± 3.413  | 35.378 ± 4.181  | 33.740 ± 4.678  |
|                  | Wits (FOP) (mm)                     | -8.700 ± 4.657   | -5.839 ± 2.706  | -5.777 ± 3.061  | -5.381 ± 2.680  |
|                  | Wits Appraisal (mm)                 | -7.597 ± 4.176   | -4.811 ± 2.353  | -4.744 ± 3.008  | -4.594 ± 2.107  |

Each value represents the mean and standard deviation (SD).

**Supplementary Table 1. Mean values of proportional skeletal variables and supplementary variables.**

| Cephalometric measurements |                                             | C1 (n=21)         | C2 (n=40)         | C3 (n=70)        | C4 (n=8)          |
|----------------------------|---------------------------------------------|-------------------|-------------------|------------------|-------------------|
| DENTAL ANGULAR             | Interincisal Angle (U1-L1) (°)              | 136.015 ± 11.783  | 137.375 ± 10.992  | 133.999 ± 10.496 | 140.680 ± 12.074  |
|                            | U1 - NA (°)                                 | 26.315 ± 6.881    | 23.655 ± 6.815    | 26.810 ± 5.903   | 24.922 ± 6.258    |
|                            | U1 - SN (°)                                 | 106.708 ± 8.628   | 101.775 ± 7.177   | 107.376 ± 6.908  | 106.048 ± 6.588   |
|                            | U1 - Palatal Plane (°)                      | 113.923 ± 7.354   | 111.236 ± 7.205   | 115.933 ± 6.294  | 116.074 ± 7.195   |
|                            | U1 - FH (°)                                 | 117.395 ± 7.835   | 113.020 ± 7.155   | 117.687 ± 6.037  | 117.215 ± 6.496   |
|                            | L1 - NB (°)                                 | 19.605 ± 7.320    | 19.725 ± 6.347    | 20.445 ± 6.886   | 16.037 ± 7.444    |
|                            | L1 to A-Po (°)                              | 24.123 ± 6.717    | 23.159 ± 5.509    | 24.080 ± 5.628   | 22.178 ± 5.924    |
|                            | L1 - FH (°)                                 | 73.418 ± 8.019    | 70.409 ± 7.172    | 71.679 ± 7.242   | 77.896 ± 8.050    |
|                            | IMPA (L1-MP) (°)                            | 82.944 ± 8.345    | 85.443 ± 6.433    | 88.820 ± 7.676   | 88.213 ± 7.611    |
|                            | L6 long axis - MP (°)                       | 79.105 ± 8.759    | 82.491 ± 8.909    | 81.898 ± 6.926   | 84.602 ± 10.667   |
|                            |                                             |                   |                   |                  |                   |
| DENTAL LINEAR              | Overjet (mm)                                | 0.244 ± 2.816     | 1.220 ± 1.858     | 1.313 ± 2.128    | 1.522 ± 2.138     |
|                            | Overbite (mm)                               | 0.613 ± 1.697     | 1.159 ± 1.611     | 1.237 ± 1.511    | 2.259 ± 1.842     |
|                            | U1 - NA (mm)                                | 6.564 ± 2.656     | 5.434 ± 2.168     | 6.301 ± 2.021    | 5.083 ± 1.823     |
|                            | U1 to Occlusal Plane (mm)                   | -0.167 ± 1.567    | 0.268 ± 1.743     | 0.249 ± 1.541    | 0.835 ± 1.614     |
|                            | U1 - PP (UADH) (mm)                         | 30.041 ± 3.750    | 28.291 ± 2.604    | 27.916 ± 2.782   | 24.737 ± 2.335    |
|                            | U1 to Nasion Perp (mm)                      | 8.010 ± 5.250     | 4.450 ± 4.065     | 7.495 ± 4.149    | 8.128 ± 3.620     |
|                            | L1 - NB (mm)                                | 3.644 ± 2.427     | 3.236 ± 2.186     | 3.330 ± 2.253    | 1.485 ± 2.083     |
|                            | L1 Protrusion (L1-APo) (mm)                 | 3.903 ± 2.687     | 2.850 ± 2.424     | 3.304 ± 2.545    | 1.270 ± 2.448     |
|                            | L1 to Occlusal Plane (mm)                   | 0.772 ± 1.507     | 0.857 ± 1.595     | 0.962 ± 1.385    | 1.398 ± 1.298     |
|                            | L1 - MP (LADH) (mm)                         | 40.623 ± 4.237    | 39.411 ± 3.493    | 40.617 ± 3.236   | 37.752 ± 3.135    |
|                            | L1 Tip - VRP (mm)                           | 68.213 ± 8.628    | 64.461 ± 5.854    | 71.182 ± 7.020   | 68.326 ± 5.706    |
|                            | U6 - PT Vertical (mm)                       | 17.213 ± 4.572    | 14.368 ± 3.202    | 18.246 ± 3.462   | 17.924 ± 2.839    |
|                            | U6 - PP (UPDH) (mm)                         | 25.241 ± 2.848    | 23.268 ± 2.157    | 24.422 ± 2.083   | 22.320 ± 2.371    |
|                            | L6 - MP (LPDH) (mm)                         | 32.205 ± 3.858    | 30.902 ± 3.089    | 32.637 ± 3.115   | 30.896 ± 3.004    |
|                            | Molar Relation (mm)                         | -5.444 ± 2.650    | -4.677 ± 2.229    | -4.623 ± 2.034   | -4.061 ± 2.121    |
| SOFT TISSUE ANGULAR        | NLA (Nasal Angle) (°)                       | 129.767 ± 8.246   | 133.489 ± 7.197   | 131.657 ± 9.337  | 133.272 ± 9.101   |
|                            | Facial Convexity (G'-Sn-Po') (°)            | 101.408 ± 141.492 | 131.998 ± 111.125 | 146.763 ± 90.999 | 129.304 ± 116.457 |
|                            | H-Angle (Pg'UL-Pg'Na') (°)                  | 7.251 ± 3.541     | 8.170 ± 3.569     | 8.639 ± 4.753    | 7.566 ± 4.819     |
| SOFT TISSUE LINEAR         | Upper Lip - S Line (mm)                     | -3.741 ± 1.856    | -3.770 ± 2.239    | -3.401 ± 2.482   | -3.415 ± 2.308    |
|                            | Upper Lip - VRP (mm)                        | 80.428 ± 8.815    | 77.870 ± 6.113    | 84.837 ± 7.823   | 83.064 ± 6.695    |
|                            | STissue N Vert (N Perp) to Upper Lip (mm)   | 14.349 ± 5.404    | 11.389 ± 3.782    | 13.835 ± 4.529   | 15.319 ± 3.995    |
|                            | Lower Lip - S Line (mm)                     | -0.800 ± 2.125    | -1.723 ± 2.260    | -1.109 ± 2.279   | -2.489 ± 2.266    |
|                            | Lower Lip to E-Plane (mm)                   | -3.603 ± 2.387    | -4.434 ± 2.648    | -3.793 ± 2.607   | -5.164 ± 2.576    |
|                            | Lower Lip - VRP (mm)                        | 81.277 ± 9.164    | 76.793 ± 6.341    | 84.598 ± 7.979   | 82.228 ± 6.563    |
|                            | STissue N Vert (N Perp) to Lower Lip (mm)   | 16.108 ± 6.057    | 11.357 ± 4.426    | 14.399 ± 4.399   | 15.387 ± 3.618    |
|                            | STissue N Vert (N Perp) to ST Pogonion (mm) | 14.685 ± 7.470    | 9.080 ± 5.840     | 12.426 ± 5.467   | 17.709 ± 9.276    |
|                            | Sn'-Me' (mm)                                | 73.762 ± 8.767    | 69.680 ± 6.163    | 70.712 ± 5.103   | 64.055 ± 9.420    |
| SOFT TISSUE PROPORTIONS    | g'-sn'/sn'-me' (%)                          | 90.310 ± 7.348    | 96.941 ± 7.690    | 93.785 ± 7.282   | 100.700 ± 7.371   |
|                            | g'-sn'/sn'-gn' (%)                          | 99.536 ± 7.996    | 107.057 ± 8.477   | 104.048 ± 8.019  | 112.866 ± 8.549   |
|                            | Sn-Stomion / Sn-Me (%)                      | 33.018 ± 2.296    | 33.484 ± 2.760    | 33.710 ± 2.772   | 33.147 ± 2.852    |
| AIR WAYS ANGULAR           | OPT - NS (°)                                | 101.172 ± 7.745   | 99.430 ± 36.033   | 99.555 ± 8.198   | 99.030 ± 6.554    |
| AIR WAY LINEAR             | Lower Airway: Oro-pharyngeal                | 10.821 ± 3.354    | 11.241 ± 4.763    | 11.266 ± 5.513   | 12.238 ± 6.775    |
|                            | Upper Airway: Naso-pharyngeal               | 14.379 ± 2.869    | 13.325 ± 4.847    | 15.632 ± 5.882   | 14.536 ± 6.322    |
|                            | Anterior nasal cavity height (mm)           | 50.433 ± 5.874    | 49.925 ± 4.719    | 49.610 ± 4.050   | 46.985 ± 5.538    |
|                            | Posterior nasal cavity height (mm)          | 81.687 ± 7.401    | 81.623 ± 5.165    | 80.339 ± 6.902   | 79.123 ± 6.150    |
|                            | H - PP (ANS-PNS) (mm)                       | -61.177 ± 8.927   | -58.364 ± 7.618   | -61.838 ± 8.405  | -58.766 ± 8.785   |
|                            | PNS to Basion (mm)                          | 43.323 ± 3.622    | 42.034 ± 3.790    | 44.417 ± 4.482   | 44.187 ± 3.755    |

Each value represents the mean and standard deviation (SD).
