# Supplementary material for: Novel Sub-Clustering of Class III Skeletal Malocclusion Phenotypes in a Southern European Population Based on Proportional Measurements
Source: J Clin Med. 2020 Sep 22;9(9):3048. doi: 10.3390/jcm9093048 (PMC7565379; doi:10.3390/jcm9093048)
Supplement: Supplementary file 1 [file jcm-09-03048-s001.zip › Supplementary Table 2. Explanation of cephalometric measuremments and abbreviations..pdf]

Supplementary Table 2. Explanation of cephalometric measurements and abbreviations.

|                       |                                                               |                                                                                                                                               |
|-----------------------|---------------------------------------------------------------|-----------------------------------------------------------------------------------------------------------------------------------------------|
| SKELETAL PROPORTIONAL | S-Go/N-Me (%)                                                 | Proportion existing between Sella (S) - Gonion (Go) distance and the Nasion (N) and Menton (Me) distance                                      |
|                       | PFH:AFH (%)                                                   | Ratio of Posterior Facial Height (PFH) to Anterior Facial Height (AFH)                                                                        |
|                       | S-Ar/Ar-Go (%)                                                | Ratio of posterior cranial base (S-Ar) to ramus height (Ar-Go)                                                                                |
|                       | N-ANS/(N-ANS+ANS-Me) (%)                                      | Proportion of upper facial height                                                                                                             |
|                       | ANS-Me:N-Me (%)                                               | Ratio of Lower Facial Height (LFH) to Total Facial Height (TFH)                                                                               |
|                       | N-ANS/ANS-Me (%)                                              | Total Facial Height Ratio                                                                                                                     |
|                       | SN/GoMe (%)                                                   | Proportion between Sella (S) - Nasion (N) line and Gonion (Go) - Menton (Me) line.                                                            |
|                       | ANS-PNS/Me-Go (%)                                             | Ratio of maxillary length (ANS-PNS) to mandibular length (Me-Go)                                                                              |
|                       | Articular Angle/SNB (%)                                       | Ratio of Articular angle (S-R-Go) and SNB angle                                                                                               |
|                       | SN-Ar/ SNA (%)                                                | Ratio of Sella angle (S-N-Ar) and SNA angle                                                                                                   |
|                       | Occ Plane to FH/MP-FH (%)                                     | Ratio of occlusal plane - Frankfort plane angle and mandibular plane - Frankfort plane (FH) angle                                             |
|                       | Occ Plane to SN/SN - GoGn (%)                                 | Ratio of occlusal plane - Sella (S)-Nasion (N) plane angle and Sella (S)-Nasion (N) plane - Gonion (Go)-Gnation (Gn) plane angle              |
|                       | SN-Palatal Plane/ SN - GoGn (%)                               | Ratio of Sella (S)-Nasion (N) plane and palatal plane (ANS-PNS) angle and Sella (S)-Nasion (N) plane - Gonion (Go) - Gnation (Gn) plane angle |
|                       | SN/Go-Pg (%)                                                  | Ratio of Anterior Cranial Base (S-N) to Length of Mand Base (Go-Pg)                                                                           |
|                       | ANS-PNS/SN (%)                                                | Ratio of Maxillary length (ANS-PNS) to Anterior Cranial Base (S-N)                                                                            |
|                       | ANS-PNS/Co-A (%)                                              | Ratio of Maxillary length (ANS-PNS) to Midface Length (Co-A)                                                                                  |
|                       | ANS-PNS/Go-Pg (%)                                             | Ratio of Maxillary length (ANS-PNS) toLength of Mandibular Base (Go-Pg)                                                                       |
|                       | Midface Length (Co-A)/Mandibular length (Co-Gn) (%)           | Ratio of Midface Length (Co-A) to Mandibular length (Co-Gn)                                                                                   |
|                       | Mandibular Body Length (Go-Gn)/Mandibular length (Co-Gn) (%)  | Ratio of Mandibular Body Length (Go-Gn) to Mandibular length (Co-Gn)                                                                          |
|                       | Ar - A/Ar - Gn (%)                                            | Ratio of Articulare (Ar) and point A (A) distance to Articulare (Ar) and Gnation (Gn) distance                                                |
|                       | Posterior Cranial Base (S-Ar)/Posterior Face Height (SGo) (%) | Ratio of Posterior Cranial Base (S-Ar) to Posterior Face Height (S-Go)                                                                        |
|                       | Ramus Height (Ar-Go)/Posterior Face Height (SGo) (%)          | Ratio of Ramus Height (Ar-Go) to Posterior Face Height (S-Go)                                                                                 |
|                       | Posterior Cranial Base (S-Ar)/Upper Face Height (N-ANS) (%)   | Ratio of Posterior Cranial Base (S-Ar) to Upper Face Height (N-ANS)                                                                           |
| SKELETAL ANGULAR      | Ramus Height (Ar-Go)/Lower Face Height (ANS-Me) (%)           | Ratio of Ramus Height (Ar-Go) to Lower Face Height (ANS-Me)                                                                                   |
|                       | Maxillary Skeletal (A-N Perp)/Mand. Skeletal (Pg-Na Perp) (%) | Ratio to Maxillary Skeletal (A-N Perp) to Mand. Skeletal (Pg-Na Perp)                                                                         |
|                       | Convexity (A-NPg)/Pg - NB (%)                                 | Ratio to Convexity (A-NPg) to point Pogonion (Pg) - Nasion (N)-point B (B) line distance                                                      |
|                       | FH - SN (°)                                                   | Angle formed by Frankfort plane (FH) and Sella (S) - Nasion (N) plane                                                                         |
|                       | SNA (°)                                                       | Angle formed by Sella (S), Nasion (N) and point A (A)                                                                                         |
|                       | SNB (°)                                                       | Angle formed by Sella (S), Nasion (N) and point B (B)                                                                                         |
|                       | ANB (°)                                                       | Angle formed by Nasion (N), point A (A) and point B (B)                                                                                       |
|                       | SND (°)                                                       | Angle formed by Sella (S), Nasion (N) and point D (D)                                                                                         |
|                       | Y-Axis (°)                                                    | Angle formed by Sella (S) - Gnation (Gn) plane and Sella (S) - Nasion (N) plane                                                               |
|                       | SN - GoGn (°)                                                 | Angle formed by Sella (S) - Nasion (N) plane and Gonion (Go) - Gnation (Gn) plane                                                             |
|                       | Cranio-Mx Base/SN-Palatal Plane (°)                           | Angle formed by Sella (S) - Nasion (N) plane and palatal plane                                                                                |
|                       | Occ Plane to SN (°)                                           | Angle formed by occlusal plane and Sella (S) - Nasion (N) plane                                                                               |
|                       | Occ Plane to FH (°)                                           | Angle formed by occlusal plane and Frankfort plane (FH)                                                                                       |
|                       | NBa-PtGn (°) (Facial Axis-Ricketts)                           | Angle formed by Nasion (N) - Basion (Ba) plane and Pterigoid (Pt) - Gnation (Gn) plane                                                        |
|                       | MP-FH (°)                                                     | Angle of mandibular plane (FMA). Angle formed by mandibular plane (MP) and Frankfort plane (FH)                                               |
|                       | ANS-Xi-Pm (°) (Lower Face Height)                             | Angle formed by the anterior nasal spine (ANS), Xi point and suprapogonion (Pm)                                                               |
|                       | FH-NPg (°) (Facial Angle)                                     | Angle formed by Frankfort plane (FH) and Nasion (N) - Pogonion (Pg) plane                                                                     |
|                       | N-A-Pg (°)                                                    | Angle formed by Nasion (N), point A (A) and Pogonion (Pg)                                                                                     |
|                       | Facial Taper (°)                                              | Angle formed by the mandibular plane and facial plane                                                                                         |
|                       | Ar-Go-Me (°) (Gonial/Jaw Angle)                               | Angle formed by the Articulare (Ar), Gonion (Go) and Menton (Me)                                                                              |
|                       | Ar-Go-Na (°) (Upper Gonial Angle)                             | Angle formed by the Articulare (Ar), Gonion (Go) and Nasion (N)                                                                               |
|                       | Na-Go-Me (°) (Lower Gonial Angle)                             | Angle formed by the Nasion (N), Gonion (Go) and Menton (Me)                                                                                   |
|                       | Articular Angle (°)                                           | Angle formed by Sella (S), Articulare (Ar) and Gonion (Go)                                                                                    |
|                       | SN-Ar (°) (Saddle/Sella Angle)                                | Angle formed by the Sella(S), Nasion (Na) and Articulare (Ar)                                                                                 |
|                       | SN-AB (°) (Superior Angle)                                    | Angle formed by Sella (S) - Nasion (N) plane and point A (A) - point B (B) plane                                                              |
|                       | Rp-FH (°)                                                     | Angle formed by ramus plane (Rp) and Frankfort plane (FH)                                                                                     |

Supplementary Table 2. Explanation of cephalometric measurements.

|                 |                                     |                                                                                                                                                                                               |
|-----------------|-------------------------------------|-----------------------------------------------------------------------------------------------------------------------------------------------------------------------------------------------|
| SKELETAL LINEAR | SN (mm) (Anterior Cranial Base)     | Distance between Sella (S) and Nasion (N)                                                                                                                                                     |
|                 | NMe (mm) (Anterior Face Height)     | Distance between Nasion (N) and Menton (Me)                                                                                                                                                   |
|                 | N-ANS (mm) (Upper Face Height)      | Distance between Nasion (N) and Anterior Nasal Spine (ANS)                                                                                                                                    |
|                 | ANS-Me (mm) (Lower Face Height)     | Distance between Anterior Nasal Spine (ANS) and Menton (Me)                                                                                                                                   |
|                 | S-Ar (mm) (Posterior Cranial Base)  | Distance between Sella (S) and Articulare (Ar)                                                                                                                                                |
|                 | SGo (mm) (Posterior Face Height)    | Distance between Sella (S) and Gonion (Go)                                                                                                                                                    |
|                 | Ar-Go (mm) (Ramus Height)           | Distance between Articular (Ar) and Gonion (Go)                                                                                                                                               |
|                 | Co-Go (mm)                          | Distance between Condilion (Co) and Gonion (Go)                                                                                                                                               |
|                 | Convexity (A-NPg) (mm)              | Distance from point A (A) to Nasion (N)-Pogonion (Pg) line                                                                                                                                    |
|                 | A-N Perp (mm) (Maxillary Skeletal)  | Distance from point A (A) to the line perpendicular to Frankfort plane via Nasion (N perp)                                                                                                    |
|                 | Co-A (mm) (Midface Length)          | Distance between Condilion (Co) and point A (A)                                                                                                                                               |
|                 | Ar - A (mm)                         | Distance between Articulare (Ar) and point A (A)                                                                                                                                              |
|                 | ANS-PNS (mm) (Maxillary length)     | Distance between Anterior Nasal Spine (ANS) and Posterior Nasal Spine (PNS)                                                                                                                   |
|                 | Pg - NB (mm)                        | Distance between Pogonion (Pg) to Nasion (N) - point B (B) line                                                                                                                               |
|                 | Pg-N Perp (mm) (Mand. Skeletal)     | Distance between point B (B) to the line perpendicular to the Frankfort plane via Nasion (N perp)                                                                                             |
|                 | Go-Gn (mm) (Mandibular Body Length) | Distance between Gonion (Go) and Gnation (Gn)                                                                                                                                                 |
|                 | Go-Pg (mm) (Length of Mand Base )   | Distance between Gonion (Go) and Pogonion (Pg)                                                                                                                                                |
|                 | Co-Gn (mm) (Mandibular length)      | Distance between the Condilion (Co) and Gnation (Gn)                                                                                                                                          |
|                 | Co-B1 Total mand (mm)               | Distance between Condilion (Co) and point B (B)                                                                                                                                               |
|                 | Ar - Gn (mm)                        | Distance between Articular point (Ar) and Gnation (Gn)                                                                                                                                        |
|                 | Basal Width (mm)                    | Horizontal distance of the symphysis at point B (B) level                                                                                                                                     |
| DENTAL ANGULAR  | Co-Gn - Co-A(mm)(Mx/Md diff)        | Difference between the Condilion (Co) - Gnation (Gn) distance and the Condilion (Co) - point A (A) distance                                                                                   |
|                 | Wits (FOP) (mm)                     | Distance between point A and point B projected in the functional occlusal plane                                                                                                               |
|                 | Wits Appraisal (mm)                 | Distance between point A and point B projected in the occlusal plane                                                                                                                          |
|                 | U1-L1 (°) (Interincisal Angle )     | Angle between upper incisor axis(U1) and lower incisor axis(L1).                                                                                                                              |
|                 | U1 - NA (°)                         | Angle between upper incisor axis (U1) and Nasion (N)-point A (A) line                                                                                                                         |
|                 | U1 - SN (°)                         | Angle between upper incisor axis (U1) and Sella (S)-Nasion point(N) line                                                                                                                      |
|                 | U1 - Palatal Plane (°)              | Angle between upper incisor axis (U1) and the palatal plane                                                                                                                                   |
|                 | U1 - FH (°)                         | Angle between the upper incisor axis (U1) and Frankfort plane (FH)                                                                                                                            |
|                 | L1 - NB (°)                         | Angle between lower incisor axis (L1) and Nasion (N)-point B (B) line                                                                                                                         |
|                 | L1 to A-Pg (°)                      | Angle between lower incisor axis (L1) and point A (A)- Pogonion (Pg) line                                                                                                                     |
| DENTAL LINEAR   | L1 - FH (°)                         | Angle between lower incisor axis (L1) and Frankfort plane (FH)                                                                                                                                |
|                 | L1-MP (°) (IMPA)                    | Angle between lower incisor axis (L1) and mandibular plane.                                                                                                                                   |
|                 | L6 long axis - MP (°)               | Angle between first lower molar axis (L6) and mandibular plane                                                                                                                                |
|                 | Overjet (mm)                        | Horizontal distance between the incisal edge of the upper incisor (U1) and the lower incisor (L1)                                                                                             |
|                 | Overbite (mm)                       | Vertical distance between the incisal edge of the upper incisor (U1) and the lower incisor (L1)                                                                                               |
|                 | U1 - NA (mm)                        | Distance between upper incisor (U1) and Nasion (N)-point A (A) line                                                                                                                           |
|                 | U1 to Occlusal Plane (mm)           | Distance between upper incisor (U1) and occlusal plane                                                                                                                                        |
|                 | U1 - PP (UADH) (mm)                 | Distance between upper incisor (U1) and palatal plane                                                                                                                                         |
|                 | U1 to Nasion Perp (mm)              | Distance between upper incisor (U1) and the line perpendicular to Frankfort via the Nasion (N)                                                                                                |
|                 | L1 - NB (mm)                        | Distance between lower incisor (L1) and Nasion (N) - point B (B) line                                                                                                                         |
|                 | L1-APg (mm) (L1 Protrusion)         | Distance between lower incisor (L1) and point A (A) - Pogonion (Pg) line                                                                                                                      |
|                 | L1 to Occlusal Plane (mm)           | Distance between lower incisor (L1) and occlusal plane                                                                                                                                        |
|                 | L1 - MP (LADH) (mm)                 | Distance between lower incisor (L1) and mandibular plane                                                                                                                                      |
|                 | L1 Tip - VRP (mm)                   | Distance between upper incisor (U1) and perpendicular line to the vertical reference plane (VRP: plane built subtracting 7° from the Sella (S)-Nasion (N) line passing through the Sella (S)) |
|                 | U6 - PT Vertical (mm)               | Distance between first upper molar (U6) and vertical Pterigoyd line (vertical PT)                                                                                                             |
|                 | U6 - PP (UPDH) (mm)                 | Upper posterior dentoalveolar height. Distance from upper first molar (U6) to palatine plane                                                                                                  |
|                 | L6 - MP (LPDH) (mm)                 | Lower posterior dentoalveolar height. Distance between first lower molar (L6) and palatal plane                                                                                               |
|                 | Molar Relation (mm)                 | Distance between the distal surfaces of the first and second upper molar measured in the occlusal plane                                                                                       |

Supplementary Table 2. Explanation of cephalometric measurements.

|                         |                                             |                                                                                                                                                                                              |
|-------------------------|---------------------------------------------|----------------------------------------------------------------------------------------------------------------------------------------------------------------------------------------------|
| SOFT TISSUE ANGULAR     | NLA (Nasal Angle) (°)                       | Angle formed angle between columella (Cm), subnasale (Sn) and labrale superius (Ls)                                                                                                          |
|                         | G'-Sn-Pg' (°) (Facial Convexity)            | Angle formed between Glabella (G'), Subnasale (Sn) and soft Pogonion (Pg')                                                                                                                   |
|                         | Pg'UL-Pg'N' (°) (H-Angle)                   | Angle formed between Soft Pogonion (Pg') - Upper lip (UL) line and Soft Pogonion (Pg') - Soft Nasion (N') line                                                                               |
| SOFT TISSUE LINEAR      | Upper Lip - S Line (mm)                     | Distance between upper lip and S line                                                                                                                                                        |
|                         | Upper Lip - VRP (mm)                        | Distance between the upper lip and the perpendicular line to the vertical reference plane (VRP: plane built subtracting 7° from the Sella (S)-Nasion (N) line passing through the Sella (S)) |
|                         | STissue N Vert (N Perp) to Upper Lip (mm)   | Distance between the upper lip and the perpendicular line to the Frankfort plane via the Nasion pointsoft (N')                                                                               |
|                         | Lower Lip - S Line (mm)                     | Distance between lower lip and S line (esthetic plane of Steiner)                                                                                                                            |
|                         | Lower Lip to E-Plane (mm)                   | Distance between lower lip and E line (esthetic plane of Ricketts)                                                                                                                           |
|                         | Lower Lip - VRP (mm)                        | Distance between the lower lip and the perpendicular line to vertical reference plane (VRP: plane built subtracting 7° from the Sella (S)-Nasion (N) line passing through the Sella (S))     |
|                         | STissue N Vert (N Perp) to Lower Lip (mm)   | Distance between lower lip and perpendicular line to Frankfort plane via the soft Nasion (N')                                                                                                |
|                         | STissue N Vert (N Perp) to ST Pogonion (mm) | Distance between Soft Pogonion (Pg') and perpendicular line to the palatal plane via the point Soft Nasion (N')                                                                              |
|                         | Sn'-Me' (mm)                                | Distance between Subnasale (Sn) and soft Menton (Me')                                                                                                                                        |
| SOFT TISSUE PROPORTIONS | g'-sn'/sn'-me' (%)                          | Ratio between Glabela (G') - Subnasale (Sn) line and Subnasale (Sn) - soft Menton (Me') line                                                                                                 |
|                         | g'-sn'/sn'-gn' (%)                          | Ratio between Glabela (G') - Subnasale (Sn) line and Subnasale (Sn) - soft Gnation (Gn') line                                                                                                |
|                         | Sn-Stomion / Sn-Me (%)                      | Ratio between Subnasale (Sn) - Stomion line and Subnasale (Sn) - soft Menton (Me') line                                                                                                      |
| AIR WAYS ANGULAR        | OPT - NS (°)                                | Angle formed between Odontoid line (OPT) and Nasion (N') - Sella (S) line                                                                                                                    |
| AIR WAY LINEAR          | Lower Airway: Oro-pharyngeal                | Distance between the point on the back contour of the soft palate and the nearest point on the pharyngeal wall.                                                                              |
|                         | Upper Airway: Naso-pharyngeal               | Distance between the point at the intersection of the rear edge of the tongue with the lower edge of the jaw and the nearest point of the rear pharyngeal wall.                              |
|                         | Anterior nasal cavity height (mm)           | Distance between the SNP and the nearest adenoid tissue                                                                                                                                      |
|                         | Posterior nasal cavity height (mm)          | Shortest distance between the base of the tongue and the posterior wall of the pharynx                                                                                                       |
|                         | H - PP (ANS-PNS) (mm)                       | Distance between Hyoid bone (H) and palatal plane                                                                                                                                            |
|                         | PNS to Basion (mm)                          | Distance between Posterior Nasal Spine (PNS) and Basion                                                                                                                                      |
